# Supplementary material
Source: ML conference proceedings conference paper supplement (https://proceedings.mlr.press/v48/si16.html)
Supplement: Supplementary file [file si16-supp.pdf]

## 7. Appendix

### 7.1. Proof of lower approximation error

**Theorem 1.** *Using Algorithm 1 to generate  $m$  landmark points, we can guarantee that the approximation quality will become better than the traditional Nyström approximation with initial  $s$  landmark points:*

$$\|G - \bar{G}\| \leq \|G - \tilde{G}\|, \quad (15)$$

where  $\tilde{G}$  and  $\bar{G}$  are the approximation of  $G$  from standard Nyström and Algorithm 1 respectively.

*Proof.* Let us first compare our method with standard Nyström. The generalization to other sampling strategies based Nyström is straight forward. Let  $G$  denote the kernel matrix form on the  $n$  data points, and suppose  $s$  landmark points  $\mathbf{x}_1, \dots, \mathbf{x}_s$  are selected uniformly at random from the data. Let us define the sampling matrix  $S \in R^{n \times s}$  to be a zero-one matrix where  $S_{ij} = 1$  if  $i$ -th sample in the dataset is selected as landmark point.  $C$  is a  $n \times s$  matrix consisting of the corresponding  $s$  columns selected from  $G$  and  $W$  consists of the kernel matrix formed by these  $s$  landmark points. So by standard Nyström,  $\tilde{G} = CW^+G^T$ ,  $C = GS$  and  $W = S^TGS$ .

Using  $\mathbf{m}_1, \dots, \mathbf{m}_s$  as initial landmark points in Algorithm 1, after fast transforms, we totally have  $m = sd$  landmark points  $\mathbf{v}_1, \dots, \mathbf{v}_m$ , of which the last  $s$  points are the original landmark points and the rest  $m - s$  are new landmark points. Assume the new kernel matrix  $G_H$  is the kernel matrix on the union of the original  $n$  data points and  $m - s$  new added landmark points. So  $G$  is a block in  $G_H$ . Similarly we define  $S_H$ ,  $C_H$ , and  $W_H$  as sampling matrix,  $m$  sampled columns in  $G_H$  and kernel matrix formed by  $m$  landmark points respectively. So  $C_H = G_H S_H$  and  $W_H = S_H^T G_H S_H$ . Let the decomposition of  $G_H$  be  $G_H = L_H^T L_H$ . So

$$G_H = L_H^T L_H = \begin{bmatrix} \bar{L}^T \\ L^T \end{bmatrix} \begin{bmatrix} \bar{L} & L \end{bmatrix} = \begin{bmatrix} \bar{L}^T \bar{L} & \bar{L}^T L \\ L^T \bar{L} & L^T L \end{bmatrix}. \quad (16)$$

Since  $G$  is a block in  $G_H$ , the decomposition of  $G$  is  $L^T L$ .

Since  $C_H = G_H S_H = L_H^T L_H S_H$  and let the singular value decomposition of  $L_H S_H$  be  $U_H \Sigma_H V_H^T$ ,  $C_H = L_H^T U_H \Sigma_H V_H^T$ . Also we have

$$W_H = S_H^T G_H S_H = S_H^T L_H^T L_H S_H = V_H \Sigma_H^2 V_H^T. \quad (17)$$

The Nyström approximation on  $G_H$  is written as

$$\begin{aligned} G_H &= C_H W_H^+ C_H^T \\ &= L_H^T U_H \Sigma_H V_H^T V_H \Sigma_H^{-2} V_H^T V_H \Sigma_H U_H^T L_H \\ &= L_H^T U_H U_H^T L_H. \end{aligned} \quad (18)$$

So we have

$$\begin{aligned} G_H - C_H W_H^+ C_H^T &= L_H^T L_H - L_H^T U_H U_H^T L_H \\ &= (L_H - U_H U_H^T L_H)^T (L_H - U_H U_H^T L_H). \end{aligned} \quad (19)$$

The Nyström approximation error on the original  $n$  data points or  $G$  part is

$$\begin{aligned} (G_H - C_H W_H^+ C_H^T)_G &= L^T L - L^T U_H U_H^T L \\ &= (L - U_H U_H^T L)^T (L - U_H U_H^T L). \end{aligned} \quad (20)$$

According to Lemma 1 in (Drineas & Mahoney, 2005), we have the standard Nyström approximation on  $G$  as

$$\begin{aligned} G - CW^+C^T &= L^T L - L^T U U^T L \\ &= (L - U U^T L)^T (L - U U^T L). \end{aligned} \quad (21)$$

where  $LS$ 's SVD is  $U \Sigma V^T$ .

Since  $U$  is the basis for the range space of  $LS$  and  $U_H$  is the basis for the range space of  $L_H S_H$ , so  $\text{range}(U) \subseteq \text{range}(U_H)$ . According to the proposition 8.5 in (Halko et al., 2011), we have

$$\|L - U_H U_H^T L\|_2 \leq \|L - U U^T L\|_2, \quad (22)$$

so

$$\|(G_H - C_H W_H^+ C_H^T)_G\| \leq \|G - CW^+C^T\|, \quad (23)$$

or

$$\|G - \bar{G}\| \leq \|G - \tilde{G}\|. \quad (24)$$

□

### 7.2. Lemma 1

**Lemma 1.** *If the kernel function can be written as (3), assume the maximum distance between the samples and the original point is a bounded number  $R$ , and  $f, g$  are differentiable, then*

$$K(\mathbf{a}, \mathbf{b})^2 - K(\mathbf{c}, \mathbf{d})^2 \leq \eta(\|\mathbf{a} - \mathbf{c}\|^2 + \|\mathbf{b} - \mathbf{d}\|^2) \quad (25)$$

for any  $\mathbf{a}, \mathbf{b}, \mathbf{c}, \mathbf{d} \in \mathbb{R}^d$ , where

$$\eta = 4M_f^4 L_g^2 R^2 + 4M_f^2 M_g^2 L_f^2,$$

where  $M_f = \max_{\|\mathbf{x}\| \leq R} |f(\mathbf{x})|$ ,  $M_g = \max_{\|\mathbf{u}\| \leq R} |g(\mathbf{u})|$ ,  $L_f = \max_{\|\mathbf{x}\| \leq R} |f'(\mathbf{x})|$ ,  $L_g = \max_{\|\mathbf{u}\| \leq R} |g'(\mathbf{u})|$ .

*Proof.* For any  $\mathbf{a}, \mathbf{b}, \mathbf{c}, \mathbf{d} \in \mathbb{R}^d$ , we have

$$\begin{aligned}
 & (K(\mathbf{a}, \mathbf{b}) - K(\mathbf{c}, \mathbf{d}))^2 \\
 &= \left( f(\mathbf{a})f(\mathbf{b})g(\mathbf{a}^T\mathbf{b}) - f(\mathbf{c})f(\mathbf{d})g(\mathbf{c}^T\mathbf{d}) \right)^2 \\
 &= \left( (f(\mathbf{a})f(\mathbf{b})g(\mathbf{a}^T\mathbf{b}) - f(\mathbf{c})f(\mathbf{d})g(\mathbf{a}^T\mathbf{b})) \right. \\
 &\quad \left. + (f(\mathbf{c})f(\mathbf{d})g(\mathbf{a}^T\mathbf{b}) - f(\mathbf{c})f(\mathbf{d})g(\mathbf{c}^T\mathbf{d})) \right)^2 \\
 &\leq 2 \left( g(\mathbf{a}^T\mathbf{b})(f(\mathbf{a})f(\mathbf{b}) - f(\mathbf{c})f(\mathbf{d})) \right)^2 \\
 &\quad + 2 \left( f(\mathbf{c})f(\mathbf{d})(g(\mathbf{a}^T\mathbf{b}) - g(\mathbf{c}^T\mathbf{d})) \right)^2 \\
 &\leq 2M_g^2 \left( f(\mathbf{a})f(\mathbf{b}) - f(\mathbf{c})f(\mathbf{d}) \right)^2 \\
 &\quad + 2M_f^4 \left( g(\mathbf{a}^T\mathbf{b}) - g(\mathbf{c}^T\mathbf{d}) \right)^2.
 \end{aligned}$$

We can then bound each term by

$$\begin{aligned}
 & \left( f(\mathbf{a})f(\mathbf{b}) - f(\mathbf{c})f(\mathbf{d}) \right)^2 \\
 &\leq \left( f(\mathbf{a})f(\mathbf{b}) - f(\mathbf{c})f(\mathbf{b}) + f(\mathbf{c})f(\mathbf{b}) - f(\mathbf{c})f(\mathbf{d}) \right)^2 \\
 &\leq 2(f(\mathbf{a}) - f(\mathbf{c}))^2 f(\mathbf{b})^2 + 2(f(\mathbf{b}) - f(\mathbf{d}))^2 f(\mathbf{c})^2 \\
 &\leq 2M_f^2 \left( (f(\mathbf{a}) - f(\mathbf{c}))^2 + (f(\mathbf{b}) - f(\mathbf{d}))^2 \right) \\
 &= 2M_f^2 \left( f'(\xi_1)^2 \|\mathbf{a} - \mathbf{c}\|^2 + f'(\xi_2)^2 \|\mathbf{b} - \mathbf{d}\|^2 \right) \\
 &\leq 2M_f^2 L_f^2 (\|\mathbf{a} - \mathbf{c}\|^2 + \|\mathbf{b} - \mathbf{d}\|^2)
 \end{aligned}$$

Similarly, we have

$$\begin{aligned}
 & (g(\mathbf{a}^T\mathbf{b}) - g(\mathbf{c}^T\mathbf{d}))^2 \\
 &= (g'(\xi)(\mathbf{a}^T\mathbf{b} - \mathbf{c}^T\mathbf{d}))^2 \\
 &\leq L_g^2 (\mathbf{a}^T\mathbf{b} - \mathbf{c}^T\mathbf{b} + \mathbf{c}^T\mathbf{b} - \mathbf{c}^T\mathbf{d})^2 \\
 &= L_g^2 ((\mathbf{a} - \mathbf{c})^T\mathbf{b} + (\mathbf{b} - \mathbf{d})^T\mathbf{c})^2 \\
 &\leq 2L_g^2 (\|\mathbf{a} - \mathbf{c}\|^2 \|\mathbf{b}\|^2 + 2\|(\mathbf{b} - \mathbf{d})^T\mathbf{c}\|^2) \\
 &\leq 2L_g^2 R^2 (\|\mathbf{a} - \mathbf{c}\|^2 + \|\mathbf{b} - \mathbf{d}\|^2)
 \end{aligned}$$

This proves (25).  $\square$

### 7.3. Parameters for the experimental results

- All the experiments were conducted on a machine with an Intel Xeon X5440 2.83GHz CPU and 32G RAM. We tried to have the best implementation for each algorithm. Fast-Nys, DC-Pred++, Nys, KNys, RKS, Fastfood are all implemented in C sharing the

same modules. LDKL is the highly optimized C++ implementation published along with the original paper (Jose et al., 2013).

- The degree for the polynomial kernel and homogeneous kernel is set to be 3.
- We do data normalization with mean to be 0 and variance to be 1 before running our algorithms.
- When working on fast prediction experiments, we first form the low-rank approximation for the kernel matrix and apply liblinear to perform the classification.
- For fast prediction parameters ( $\gamma$  is the width parameters for Gaussian kernel and  $C$  is the regularization term in Liblinear SVM):
  - cifar:  $\gamma = 2^{-10}, C = 64$ ;
  - mnist:  $\gamma = 2^{-10}, C = 128$ ;
  - a9a:  $C = 32$ ;
- For kernel approximation:
  - magic:  $\gamma = 0.01$
  - ijcn:  $\gamma = 0.01$
  - webspam:  $\gamma = 1$
- When working on prediction, we use random samples as the initial landmarks for Fast-Nys. The number of initial landmarks ranges from 2 to 10.
- When using kmeans Nyström, we randomly sample 10000 data samples to perform clustering.
- For LDKL, for a fair comparison, we disable the SSD operation.
- We use an alternating minimization algorithm to find the seeds in our algorithm. The algorithm usually converges to a reasonably good solution in 10 iterations, so we fix the number of iterations to be 10 for all the experiments. For example, on MNIST dataset with  $k=10$ , the initial objective function value (using random samples) is 1750260, after 10 iterations it drops to 90041, and the converged solution has objective function value 89872.

### 7.4. Comparison with other kernel approximation methods

We show the comparison between fast-Nys with leverage score (Gittens & Mahoney, 2013b) and entropy based landmark points (Brabanter et al., 2010) in Nyström approximation and random feature (Rahimi & Recht, 2007).

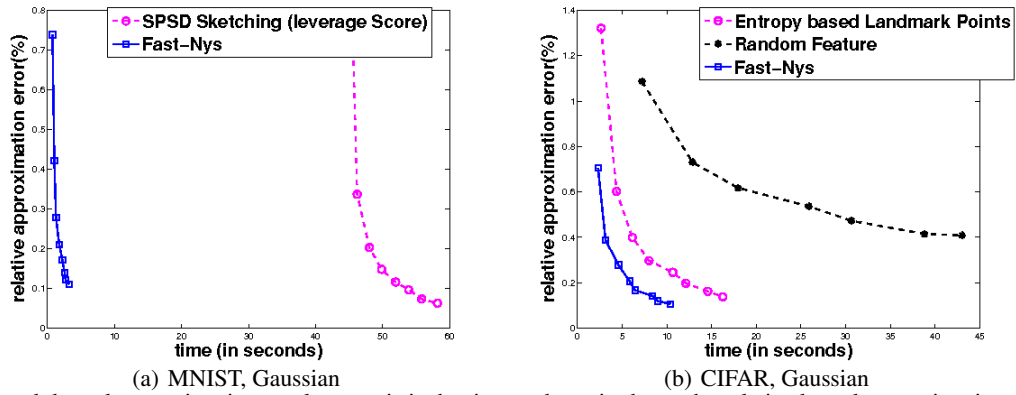

Figure 5. Low-rank kernel approximation results.  $x$ -axis is the time and  $y$  axis shows the relative kernel approximation error. Methods with approximation error above the top of  $y$ -axis are not shown. (a) compares Fast-Nys with sampling landmark points based on leverage score (Gittens & Mahoney, 2013a). Since this method needs to compute the entire kernel, it is much slower than our method. (b) compares Fast-Nys with entropy based landmark points based Nyström approximation (Brabanter et al., 2010) and random feature (Rahimi & Recht, 2008). We can also observe Fast-Nys achieves much lower approximation error than these two methods.
